# Supplementary material for: Precise PPP molecular orbital calculations of excitation energies of polycyclic aromatic hydrocarbons. Part 6. Spectrochemical atomic softness parameter†
Source: Royal Society of Chemistry journal article supplement (doi:10.1039/b009661j), 2001-01-01
Supplement: b009661ja.doc [file b009661ja.doc]

# Supplementary data

Table 1 Observed and calculated excitation energies of the -, - and *p*-band of acenes and benzo annelated acenes

| Parent Hydrocarbon | Benzo-annelated Position | Absorption Band | *Eobs.* |  | *Ecalc.* |  |
| --- | --- | --- | --- | --- | --- | --- |
| N•M- | New- | New-A |
| naphthalene | - | *p*     | 4.38  4.03  5.62 | 4.42  3.92  5.54 | 4.40  3.90  5.43 | -  -  - |
| A | *p*     | 4.23  3.63  4.93 | 4.18  3.62  4.91 | 4.17  3.58  4.86 | 4.18  3.60  4.91 |
| A, B | *p*     | 4.36  3.55  4.74 | 4.15  3.77  4.75 | 4.15  3.70  4.66 | 4.14  3.74  4.73 |
| A, C | *p*     | 3.87  3.46  4.65 | 3.80  3.50  4.62 | 3.77  3.44  4.55 | 3.84  3.48  4.65 |
| A, D | *p*     | 3.84  3.38  4.48 | 3.93  3.48  4.33 | 3.92  3.41  4.25 | 3.98  3.46  4.39 |
| A, B, C | *p*     | -  -  - | 3.76  3.50  4.38 | 3.73  3.43  4.30 | 3.80  3.48  4.41 |
| A, B, C, D | *p*     | 3.43  3.15  4.18 | 3.63  3.48  4.30 | 3.60  3.40  4.19 | 3.67  3.47  4.34 |
| anthracene | - | *p*     | 3.38  3.57  4.86 | 3.48  3.48  4.81 | 3.32  3.38  4.56 | -  -  - |
| A | *p*     | 3.53  3.26  4.36 | 3.63  3.40  4.26 | 3.49  3.22  4.04 | 3.50  3.27  4.20 |
| A, B | *p*     | 3.56  3.34  4.39 | 3.75  3.49  4.29 | 3.66  3.29  4.05 | 3.68  3.34  4.19 |
| A, C | *p*     | 3.57  3.18  4.29 | 3.65  3.38  4.24 | 3.52  3.17  4.02 | 3.59  3.23  4.16 |
| A, D | *p*     | 3.60  3.19  4.20 | 3.73  3.37  4.03 | 3.63  3.16  3.81 | 3.64  3.21  4.01 |
| A, B, C | *p*     | 3.68  3.24  4.15 | 3.77  3.44  4.11 | 3.67  3.22  3.91 | 3.74  3.28  4.07 |
| A, B, C, D | *p*     | 3.71  3.14  4.09 | 3.81  3.50  4.16 | 3.76  3.26  3.88 | 3.81  3.33  4.07 |

Table 1 Continued

| Parent Hydrocarbon | Benzo-annelated Position | Absorption Band | *Eobs.* |  | *Ecalc.* |  |
| --- | --- | --- | --- | --- | --- | --- |
| N•M- | New- | New-A |
| naphthacene | - | *p*     | 2.71  3.32  4.52 | 2.95  3.25  4.34 | 2.69  3.08  3.95 | -  -  - |
| A | *p*     | 2.83  -  3.96 | 3.09  4.10  4.13 | 2.84  2.96  3.55 | 2.84  3.01  3.70 |
| A, B | *p*     | 2.92  -  3.94 | 3.21  3.30  3.99 | 2.98  3.01  3.62 | 2.98  3.06  3.79 |
| A, C | *p*     | 2.95  -  3.92 | 3.24  3.28  3.89 | 2.97  2.94  3.53 | 2.98  3.00  3.74 |
| A, D | *p*     | 2.95  -  3.88 | 3.27  3.29  3.77 | 2.99  2.93  3.44 | 2.99  2.99  3.64 |
| A, B, C | *p*     | 3.03  -  3.85 | 3.37  3.35  3.85 | 3.11  2.98  3.50 | 3.13  3.04  3.71 |
| A, B, C, D | *p*     | 3.08  2.89  3.81 | 3.48  3.41  3.94 | 3.24  3.03  3.53 | 3.27  3.09  3.74 |
| pentacene | - | *p*     | 2.23  3.05  4.14 | 2.58  3.12  4.03 | 2.23  2.90  3.56 | -  -  - |
| A | *p*     | 2.37  -  3.71 | 2.70  3.16  3.82 | 2.35  2.89  3.37 | 2.35  2.90  3.50 |
| A, B | *p*     | 2.42  -  3.69 | 2.79  3.19  3.80 | 2.46  2.82  3.31 | 2.45  2.88  3.48 |
| A, C | *p*     | 2.47  -  3.62 | 2.85  3.23  3.70 | 2.48  2.78  3.23 | 2.47  2.84  3.45 |
| A, D | *p*     | -  -  - | 2.86  3.24  3.81 | 2.48  3.04  3.39 | 2.47  3.03  3.51 |
| A, B, C | *p*     | -  -  - | 2.95  3.29  3.76 | 2.58  2.80  3.20 | 2.58  2.86  3.47 |
| A, B, C, D | *p*     | 2.57  -  3.56 | 3.05  3.33  3.76 | 2.69  2.84  3.25 | 2.69  2.89  3.46 |

Table 2 Observed and calculated bond lengths

| Compound | Bonda | Obs. | *ab initio*  6-31G* | PPP  N•M- | PPP  new- |
| --- | --- | --- | --- | --- | --- |
| naphthalene | a  b  d  dd | 1.371  1.412  1.422  1.420 | 1.358  1.417  1.421  1.409 | 1.380  1.416  1.423  1.415 | 1.381  1.415  1.422  1.416 |
| anthracene | a  b  d  dd  e | 1.375  1.418  1.444  1.433  1.405 | 1.348  1.433  1.436  1.425  1.389 | 1.375  1.423  1.431  1.424  1.405 | 1.377  1.420  1.428  1.426  1.406 |
| naphthacene | a  b  d  dd  e  f  ff | 1.381  1.459  1.420  1.420  1.390  1.404  1.460 | 1.342  1.442  1.444  1.438  1.373  1.408  1.428 | 1.372  1.426  1.434  1.429  1.399  1.415  1.430 | 1.376  1.422  1.430  1.430  1.401  1.414  1.432 |
| phenanthrene | a  b  c  d  dd  e  l  m  n | 1.386  1.394  1.401  1.409  1.420  1.465  1.350  1.453  1.423 | 1.366  1.402  1.368  1.411  1.404  1.461  1.339  1.440  1.409 | 1.386  1.409  1.387  1.413  1.410  1.443  1.368  1.438  1.415 | 1.387  1.408  1.387  1.413  1.411  1.442  1.368  1.437  1.414 |
| triphenylene | a  b  d  dd  e | 1.381  1.397  1.410  1.413  1.458 | 1.369  1.394  1.407  1.401  1.472 | 1.391  1.404  1.408  1.408  1.452 | 1.391  1.404  1.408  1.409  1.451 |
| dibenz[*a,h*]anthracene | a  b  c  d  dd  e  f  g  gg  h  i  j  k | 1.372  1.403  1.358  1.412  1.412  1.436  1.338  1.438  1.424  1.392  1.398  1.454  1.407 | 1.371  1.399  1.369  1.405  1.403  1.446  1.336  1.446  1.416  1.389  1.388  1.467  1.407 | 1.388  1.407  1.388  1.413  1.410  1.441  1.366  1.441  1.418  1.404  1.402  1.446  1.412 | 1.390  1.406  1.389  1.410  1.413  1.440  1.367  1.439  1.419  1.405  1.402  1.446  1.409 |

a) assignment of the alphabets to the bonds are shown in Fig. 2
